# Supplementary material for: Identification of Personality-Related Candidate Genes in Thoroughbred Racehorses Using a Bioinformatics-Based Approach Involving Functionally Annotated Human Genes
Source: MDPI journal article supplement (doi:10.3390/ani13040769), 2023-02-20
Supplement: s1 [file s1]

**Table S1.** Horse orthologous genes which have variants causing non-synonymous substitutions

| Gene ID            | Full Name                                     | Gene Symbol    | Chromosome | Position |
|--------------------|-----------------------------------------------|----------------|------------|----------|
| ENSECAG00000023711 | fatty acid amide hydrolase                    | <i>FAAH</i>    | 2          | 12167952 |
|                    |                                               |                |            | 12174477 |
|                    |                                               |                |            | 12174492 |
| ENSECAG00000018928 | period circadian regulator 3                  | <i>PER3</i>    | 2          | 43209639 |
|                    |                                               |                |            | 43231315 |
|                    |                                               |                |            | 43240108 |
| ENSECAG00000021162 | cadherin 13                                   | <i>CDH13</i>   | 3          | 31079056 |
|                    |                                               |                |            | 31230472 |
|                    |                                               |                |            | 31382147 |
|                    |                                               |                |            | 31845727 |
| ENSECAG00000008726 | neuropeptide Y                                | <i>NPY</i>     | 4          | 55899514 |
| ENSECAG00000030283 | leptin                                        | <i>LEP</i>     | 4          | 83529565 |
| ENSECAG00000019243 | hydroxysteroid 11-beta dehydrogenase 1        | <i>HSD11B1</i> | 5          | 25786262 |
| ENSECAG00000011781 | ankyrin repeat and kinase domain containing 1 | <i>ANKK1</i>   | 7          | 22319266 |
|                    |                                               |                |            | 22319267 |
|                    |                                               |                |            | 22319365 |
|                    |                                               |                |            | 22319396 |
|                    |                                               |                |            | 22319430 |
|                    |                                               |                |            | 22319446 |
|                    |                                               |                |            | 22319470 |
|                    |                                               |                |            | 22326586 |
|                    |                                               |                |            | 22327351 |
|                    |                                               |                |            | 22329824 |
| ENSECAG00000013567 | dopamine receptor D2                          | <i>DRD2</i>    | 7          | 22330242 |
|                    |                                               |                |            | 22331004 |
|                    |                                               |                |            | 22331042 |
| ENSECAG00000015952 | brain derived neurotrophic factor             | <i>BDNF</i>    | 7          | 22348064 |
| ENSECAG00000005359 | catechol-O-methyltransferase                  | <i>COMT</i>    | 8          | 96310373 |
|                    |                                               |                |            | 434481   |
| ENSECAG00000009949 | purinergic receptor P2X 7                     | <i>P2RX7</i>   | 8          | 432351   |
|                    |                                               |                |            | 24214858 |
| ENSECAG00000008236 | apolipoprotein E                              | <i>APOE</i>    | 10         | 15713778 |
|                    |                                               |                |            | 15714427 |

|                    |                                                        |               |    |          |
|--------------------|--------------------------------------------------------|---------------|----|----------|
| 15714824           |                                                        |               |    |          |
| ENSECAG00000012581 | cannabinoid receptor 1                                 | <i>CNR1</i>   | 10 | 41805559 |
| ENSECAG00000017112 | solute carrier family 6 member 4                       | <i>SLC6A4</i> | 11 | 44188160 |
|                    |                                                        |               |    | 44188161 |
|                    |                                                        |               |    | 44192165 |
|                    |                                                        |               |    | 44200439 |
| ENSECAG00000014012 | gamma-aminobutyric acid type A receptor subunit alpha6 | <i>GABRA6</i> | 14 | 17329705 |
|                    |                                                        |               |    | 17329709 |
|                    |                                                        |               |    | 17329851 |
|                    |                                                        |               |    | 17329886 |
|                    |                                                        |               |    | 17338413 |
|                    |                                                        |               |    | 17343960 |
| ENSECAG00000024282 | 5-hydroxytryptamine receptor 2A                        | <i>HTR2A</i>  | 17 | 23797786 |
| ENSECAG00000000237 | diacylglycerol kinase eta                              | <i>DGKH</i>   | 17 | 27918092 |
|                    |                                                        |               |    | 28048492 |
| ENSECAG00000022277 | monoamine oxidase A                                    | <i>MAOA</i>   | X  | 36799409 |
|                    |                                                        |               |    | 36799613 |
|                    |                                                        |               |    | 36800118 |
|                    |                                                        |               |    | 36800211 |
|                    |                                                        |               |    | 36800238 |
|                    |                                                        |               |    | 36800403 |
|                    |                                                        |               |    | 36801932 |

Gene ID: The identification ID used in Ensembl Genome Browser.
